# Supplementary material
Source: publisher figshare collection journal article supplement (https://asha.figshare.com/ndownloader/files/31412533)
Supplement: Supplementary file 1 [file 31412533]

**Supplemental Table.** Individual descriptive data for participants in each of three groups.

| Group      | Participant number | Age in years | Years since diagnosis | Hoehn & Yahr stage | Voice and speech severity | Gender |
|------------|--------------------|--------------|-----------------------|--------------------|---------------------------|--------|
| Immediate  | 02                 | 81           | 11                    | 2.5                | 2.5                       | F      |
|            | 03                 | 64           | 2                     | 2                  | 1.5                       | M      |
|            | 07                 | 57           | 5                     | 1                  | 1.6                       | F      |
|            | 09                 | 66           | 1                     | 1.5                | 2                         | F      |
|            | 15                 | 56           | 3                     | 2                  | 2.1                       | M      |
|            | 16                 | 74           | 8                     | 2                  | 3.0                       | M      |
|            | 18                 | 67           | 1                     | 2                  | 1.9                       | F      |
|            | 19                 | 61           | 4                     | 2                  | 3.6                       | M      |
| Delayed    | 01                 | 59           | 11                    | 2.5                | 1.5                       | F      |
|            | 04                 | 67           | 5                     | 2.5                | 1.3                       | F      |
|            | 06                 | 54           | 7                     | 2                  | 2.3                       | M      |
|            | 08                 | 74           | 4                     | 1.25               | 1.8                       | F      |
|            | 10                 | 66           | 1                     | 3                  | 2.9                       | M      |
|            | 12                 | 63           | 3                     | 2                  | 2.1                       | M      |
|            | 13                 | 60           | 3.5                   | 2                  | 3                         | M      |
|            | 20                 | 63           | 3                     | 1                  | 1                         | F      |
| Historical | 01                 | 67           | 17                    | —                  | 4                         | M      |
|            | 07                 | 59           | 8                     | —                  | 2                         | M      |
|            | 08                 | 59           | 2.5                   | —                  | 3                         | F      |
|            | 12                 | 51           | 4                     | —                  | 0                         | F      |
|            | 14                 | 76           | 3                     | —                  | 4                         | F      |
|            | 19                 | 74           | 17                    | —                  | 4                         | F      |
|            | 23                 | 79           | 1.5                   | —                  | 0                         | M      |
|            | 27                 | 80           | 3                     | —                  | 3                         | F      |
|            | 35                 | 61           | 4                     | —                  | 3                         | M      |
|            | 37                 | 76           | 20                    | —                  | 5                         | M      |
|            | 38                 | 67           | 7                     | —                  | 2                         | M      |
|            | 40                 | 75           | 15                    | —                  | 1                         | F      |
|            | 42                 | 66           | 8                     | —                  | 4                         | M      |

*Note.* Immediate = immediate treatment group; Delayed = delayed treatment group; Historical = historical treatment group. Em dashes indicate data not available. Hoehn & Yahr stages are 1–5, with higher stages indicating greater severity. Severity ratings of speech and voice deficits are on a scale of 0–5: 0 = *none*, 1 = *mild*, 3 = *moderate*, 5 = *severe*.
